# Supplementary material for: Can user testing of a clinical trial patient information sheet make it fit-for-purpose? - a randomized controlled trial
Source: Springer Nature journal article supplement (doi:10.1186/1741-7015-9-89), 2011-07-21
Supplement: 12916_2011_431_MOESM2_ESM.pdf [file 12916_2011_431_MOESM2_ESM.pdf]

# AML-MDS Clinical Trial

## National Research Institute For Cancer Acute Myeloid Leukaemia and High Risk MDS Trial

---

### We invite you to take part in a research study

---

- Before you decide whether to take part, it is important for you to understand why the research is being done and what it will involve.
- Please take time to read the following information carefully. Discuss it with friends and relatives if you wish. Take time to decide whether or not you wish to take part.
- You are free to decide whether or not to take part in this research study. If you choose not to take part, this will not affect the care you get from your own doctors.
- Ask us if there is anything that is not clear or if you would like more information.
- Thank you for reading this information. If you decide to take part you will be given a copy of this information sheet and your signed consent form.

---

### Important things that you need to know

---

- We want to find out the best non-intensive treatment for Acute Myeloid Leukaemia (AML) and Myelodysplasia (MDS).
- We are testing three new medicines, which are Clofarabine, Mylotarg and Trisenox, and an existing medicine, which is Cytarabine.
- The medicines are given separately or together with other medicines, and this trial has four different groups or treatment options.
- Regardless of which treatment group you are in, you will receive four courses of treatment.
- Like all medicines used to treat leukaemia, the medicines used in this trial can have side effects.
- The trial fits into your normal treatment, so there are no extra hospital visits.
- You can stop taking part in the study at any time, without giving a reason.

---

### Contents

---

- 1** Why we are doing this study.
- 2** Why am I being asked to take part?
- 3** What do I need to know about the medicines used in this study?
- 4** What will I need to do if I take part?
- 5** Possible side effects.
- 6** Possible benefits and disadvantages of taking part.
- 7** More information about taking part.
- 8** Contacts for further information

---

### How to contact us

---

If you have any questions about this study, please talk to your doctor at

Haematology Unit  
Newland Hill NHS  
Foundation Trust  
Newland Hill Hospital  
London NW16 7BJ  
Tel: **01234 149 688**
