# Supplementary material for: Can user testing of a clinical trial patient information sheet make it fit-for-purpose? - a randomized controlled trial
Source: Springer Nature journal article supplement (doi:10.1186/1741-7015-9-89), 2011-07-21
Supplement: 12916_2011_431_MOESM4_ESM.pdf [file 12916_2011_431_MOESM4_ESM.pdf]

Allocation

Interview

**Randomised  
(n= 123)**

**Allocated to original PIS  
(n= 62)**

Received allocated intervention  
(n = 60)

Did not receive allocated  
intervention (n= 2):  
(n= 1 recruited in error; n= 1  
posted wrong PIS).

**Interviewed (n= 55)**

Not interviewed (n= 5):  
(n= 3 unwell; n= 1 unwilling to  
be interviewed; n= 1 did not  
attend)

**Allocated to revised  
PIS  
(n= 61)**

Received allocated  
intervention (n= 61)

**Interviewed (n= 61)**

Not interviewed (n= 0)
